# Supplementary material for: Transcriptome Profiling of Staphylococcus aureus Associated Extracellular Vesicles Reveals Presence of Small RNA-Cargo
Source: Front Mol Biosci. 2021 Jan 13;7:566207. doi: 10.3389/fmolb.2020.566207 (PMC7838569; doi:10.3389/fmolb.2020.566207)
Supplement: Supplementary file 2 [file Table_1.xlsx]

## Sheet: Sheet1
Table S1. Description of sample preparation and downstream applications from three independent EV isolations from bacteria grown under stressed condition. RNA concentration was measured by Qubit (RNA HS Kit) in crude EVs, EVs treated with RNase and RNA isolated from RNase-treated EVs
	No. of overnight cultures combined for isolation of crude EVs	RNA concentration (ng/µL)				Downstream application
		Crude EVs	RNase-treated EVs	RNA isolated from EVs	rRNA depleted RNA from column
RNA concentration in Biological Replicate (I)	5	NA	NA	77	40	RNA seq, AFM, confocal microscopy, TEM
RNA concentration in Biological Replicate (II)	2	Below detection limit	Below detection limit	2.78	NA	qPCR
RNA concentration in Biological Replicate (III)	2	2.73	Below detection limit	5.16	NA	qPCR, PCR and Sanger seq
					NA: Not available
